CORRECTION

# Correction: Evaluating the intensity of fire at the Acheulian site of Gesher Benot Ya'aqov—Spatial and thermoluminescence analyses

Nira Alperson-Afil, Daniel Richter, Naama Goren-Inbar

Fig 4 is incorrect. Please view the correct Fig 4 here.

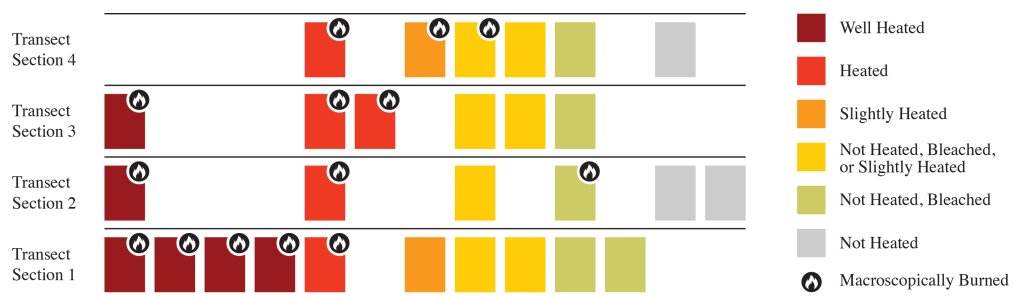

**Fig 4. Schematic illustration of the results of TL qualitative analysis in comparison with the macroscopic (visual) classification of burned and unburned flint microartifacts; based on the TL results listed in Table 3, which in turn are based on the interpretation of TL heating plateaus and TL curve shapes as exemplified in Fig 3.**

<https://doi.org/10.1371/journal.pone.0190804.g001>

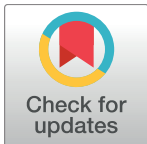

## Reference

- Alperson-Afil N, Richter D, Goren-Inbar N (2017) Evaluating the intensity of fire at the Acheulian site of Gesher Benot Ya'aqov—Spatial and thermoluminescence analyses. *PLoS ONE* 12(11): e0188091. <https://doi.org/10.1371/journal.pone.0188091> PMID: 29145432

## OPEN ACCESS

**Citation:** Alperson-Afil N, Richter D, Goren-Inbar N (2018) Correction: Evaluating the intensity of fire at the Acheulian site of Gesher Benot Ya'aqov—Spatial and thermoluminescence analyses. *PLoS ONE* 13(1): e0190804. <https://doi.org/10.1371/journal.pone.0190804>

**Published:** January 2, 2018

**Copyright:** © 2018 Alperson-Afil et al. This is an open access article distributed under the terms of the [Creative Commons Attribution License](https://creativecommons.org/licenses/by/4.0/), which permits unrestricted use, distribution, and reproduction in any medium, provided the original author and source are credited.
